# Supplementary material for: The Efficacy of Re-Warm-Up Practices during Half-Time: A Systematic Review
Source: Medicina (Kaunas). 2021 Sep 17;57(9):976. doi: 10.3390/medicina57090976 (PMC8466564; doi:10.3390/medicina57090976)
Supplement: Supplementary file 1 [file medicina-57-00976-s001.zip › medicina-1336630-supplementary.pdf]

**Electronic Supplementary Material Table S1.** Full search strategy for each database with arguments presented as they were used.

| Data Base      | Search strategy                                                                                                 | Results    |
|----------------|-----------------------------------------------------------------------------------------------------------------|------------|
| Web Of Science | ((TS=(re-warm-up)) OR TS= (half-time strategy)) OR TS= ([ "second-half" AND "warm-up"] ) OR TS= (RW-U strategy) | 325        |
| Scopus         | re-warm-up OR half-time AND strategy OR [ "second-half" AND "warm-up" ] OR RW-U strategy                        | 213        |
| SportDiscus    | re-warm-up OR RW-U strategy OR (half-time AND strategy) OR (second-half AND warm-up)                            | 62         |
| PubMed         | (re-warm-up) OR (half-time AND strategy) OR (second-half AND warm-up) OR (RWU strategy)                         | 158        |
| <b>TOTAL</b>   |                                                                                                                 | <b>758</b> |
